# Supplementary material for: Modified SHI medium supports growth of a disease‐state subgingival polymicrobial community in vitro
Source: PubMed Central journal article supplement (PMC7984074; doi:10.1111/omi.12323), 2020-12-03
Supplement: OMI-36-37-s001.pdf [file OMI-36-37-s001.pdf]

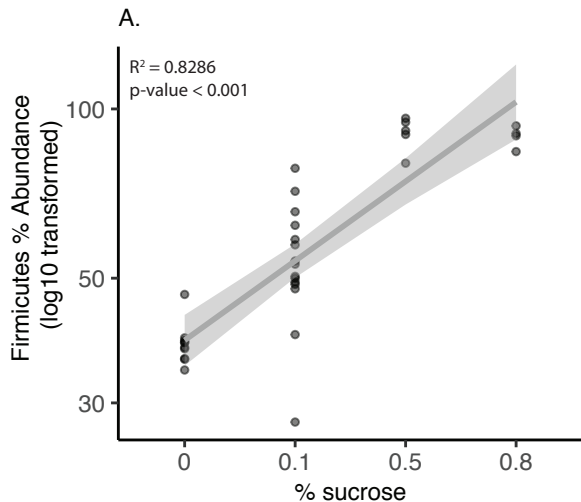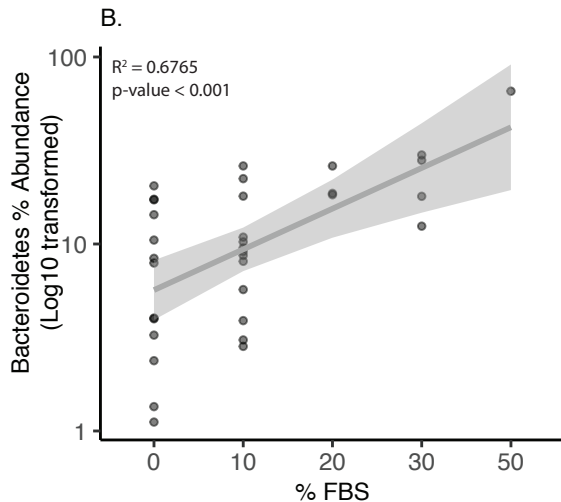

**Figure S1** Scatterplot with linear regression and 95% confidence interval showing change in the percent abundance of (A) Firmicutes with increasing sucrose concentration and (B) Bacteroidetes with increasing fetal bovine serum (FBS) concentration for all biofilm samples.
